# Heterosynaptic NMDA Receptor Plasticity in Hippocampal Dentate Granule Cells

Alma Rodenas-Ruano<sup>1,2,\*</sup>, Kaoutsar Nasrallah<sup>2</sup>, Stefano Lutz<sup>2</sup>, Maryann Castillo<sup>2</sup>,  
and Pablo E. Castillo<sup>2,3\*</sup>

<sup>1</sup> Department of Natural Science, Fordham University, New York, NY 10023, USA

<sup>2</sup> Dominick P. Purpura Department of Neuroscience, <sup>3</sup> Department of Psychiatry and Behavioral Sciences, Albert Einstein College of Medicine, Bronx, NY, 10461, USA

Abbreviated title:

\*Correspondence may be addressed to:

Alma Rodenas-Ruano, Ph.D  
Department of Natural Science  
Fordham University  
Lowenstein Building, Lincoln Center  
113 West 60<sup>th</sup> street, Room 813  
New York, NY 10023, USA  
Phone: +1.212.636.7043  
E-mail: [arodenasruano@fordham.edu](mailto:arodenasruano@fordham.edu)

Pablo E. Castillo, M.D., Ph.D.  
Dominick P. Purpura Department of Neuroscience  
Albert Einstein College of Medicine  
Rose F. Kennedy Center, Room 703  
1410 Pelham Parkway South  
Bronx, NY 10461, USA  
Phone: +1.718.430.3263  
E-mail: [pablo.castillo@einsteinmed.edu](mailto:pablo.castillo@einsteinmed.edu)

Number of figures: 5

Number of words for abstract (234), introduction (424), and discussion (1,267)

The authors declare no competing financial interests.

**Acknowledgments:** This research was supported by the National Institutes of Health: R01-MH125772, R01-NS113600 and R01-MH081935 to PEC. ARR was partially supported by the Brain & Behavior Research Foundation Young Investigator Award (2014) and the Ford Foundation Postdoctoral Fellowship (2013). KN was partially supported by the American Epilepsy Society Postdoctoral Research Fellowship (2020). M.C was supported by NIH R25GM104547. We thank all Castillo Lab members for helpful discussions

## 53 **ABSTRACT**

54 The dentate gyrus is a key relay station that controls information transfer from the entorhinal  
55 cortex to the hippocampus proper. This process heavily relies on dendritic integration by dentate  
56 granule cells (GCs) of excitatory synaptic inputs from medial and lateral entorhinal cortex via  
57 medial and lateral perforant paths (MPP and LPP, respectively). N-methyl-D-aspartate receptors  
58 (NMDARs) can contribute significantly to the integrative properties of neurons. While early studies  
59 reported that excitatory inputs from entorhinal cortex onto GCs can undergo activity-dependent  
60 long-term plasticity of NMDAR-mediated transmission, the input-specificity of this plasticity along  
61 the dendritic axis remains unknown. Here, we examined the NMDAR plasticity rules at MPP-GC  
62 and LPP-GC synapses using physiologically relevant patterns of stimulation in acute rat  
63 hippocampal slices. We found that MPP-GC, but not LPP-GC synapses, expressed homosynaptic  
64 NMDAR-LTP. In addition, induction of NMDAR-LTP at MPP-GC synapses heterosynaptically  
65 potentiated distal LPP-GC NMDAR plasticity. The same stimulation protocol induced  
66 homosynaptic  $\alpha$ -amino-3-hydroxy-5-methyl-4-isoxazolepropionic acid receptor (AMPA)-LTP at  
67 MPP-GC but heterosynaptic AMPAR-LTD at distal LPP synapses, demonstrating that NMDAR  
68 and AMPAR are governed by different plasticity rules. Remarkably, heterosynaptic but not  
69 homosynaptic NMDAR-LTP required  $\text{Ca}^{2+}$  release from intracellular, ryanodine-dependent  $\text{Ca}^{2+}$   
70 stores. Lastly, the induction and maintenance of both homo- and heterosynaptic NMDAR-LTP  
71 were blocked by GluN2D antagonism, suggesting the recruitment of GluN2D-containing receptors  
72 to the synapse. Our findings uncover a mechanism by which distinct inputs to the dentate gyrus  
73 may interact functionally and contribute to hippocampal-dependent memory formation.

74

## 75 **Significance Statement**

76 NMDARs are key players in synaptic plasticity. In addition to their classical role as coincidence  
77 detectors and triggers of AMPAR plasticity, there is compelling evidence that NMDARs can  
78 undergo activity-dependent plasticity independent of AMPAR plasticity. However, whether  
79 NMDAR-plasticity is expressed heterosynaptically remains unclear. Here, in the dentate gyrus of  
80 the hippocampus, we show that the induction of burst timing-dependent LTP of NMDAR-mediated  
81 transmission at proximal medial perforant path synapses is accompanied by heterosynaptic  
82 NMDAR-LTP at lateral perforant path synapses. These findings provide the first evidence for  
83 heterosynaptic NMDAR plasticity, which may have important consequences on the dendritic  
84 integration of functionally distinct excitatory inputs by dentate granule cells.

## 85 INTRODUCTION

86 Activity-dependent changes in synaptic strength are widely regarded as a key mechanism  
87 underlying experience-driven refinement of neuronal circuits and memory formation (Mayford et  
88 al., 2012; Takeuchi et al., 2014). Synaptic plasticity can manifest in multiple forms, including  
89 homo- and heterosynaptic plasticity. While homosynaptic plasticity is expressed at active  
90 synapses only, heterosynaptic plasticity involves a change in strength at neighboring naive  
91 synapses. Although it is well-established that glutamate NMDA receptors (NMDARs) mediate  
92 excitatory synaptic transmission and can themselves undergo long-term potentiation (LTP) and  
93 long-term depression (LTD) of NMDAR-mediated transmission (Rebola et al., 2010; Hunt and  
94 Castillo, 2012), most studies have focused on homosynaptic (Herring and Nicoll, 2016; Diering  
95 and Hugarir, 2018) and heterosynaptic (Chistiakova et al., 2014; Chater and Goda, 2021)  
96 plasticity of the AMPA receptor (AMPA)-mediated component of glutamatergic excitatory  
97 transmission. However, whether NMDAR-mediated transmission undergoes heterosynaptic  
98 plasticity has not yet been investigated.

99 The dentate gyrus is the main input area of the hippocampus (Amaral et al., 2007; Jonas and  
100 Lisman, 2014). Dentate gyrus granule cells (GCs) receive prominent cortical projections from the  
101 medial and lateral entorhinal cortex which convey context and content related information, through  
102 the medial- and lateral perforant pathway (MPP and LPP), respectively (Knierim et al., 2014).  
103 Activity-dependent changes of these inputs, and their dendritic integration by GCs are critical to  
104 dentate gyrus information processing (Schmidt-Hieber et al., 2007; Krause et al., 2008; Krueppel  
105 et al., 2011; Knierim et al., 2014). MPP and LPP inputs onto GCs express robust homosynaptic  
106 (Bliss and Lomo, 1973; Colino and Malenka, 1993; Richter-Levin et al., 1995) and heterosynaptic  
107 (Abraham et al., 2007; Jungnitz et al., 2018) AMPAR long-term plasticity. Furthermore, early  
108 studies showed that high frequency stimulation can also trigger homosynaptic NMDAR plasticity  
109 at MPP-GC excitatory synapses (O'Connor et al., 1994; Harney et al., 2006). To our knowledge,  
110 whether homo- or heterosynaptic NMDAR plasticity is expressed at distal LPP inputs onto GCs  
111 is unknown.

112 Here, we examined homo- and heterosynaptic plasticity of NMDAR-mediated transmission at  
113 entorhinal-GC synapses by pairing physiologically relevant patterns of pre- and postsynaptic burst  
114 activity in acute rat and mouse hippocampal slices. Burst pairing stimulation induced  
115 homosynaptic NMDAR-LTP at MPP-GC but not at LPP-GC synapses. In addition, homosynaptic  
116 NMDAR-LTP at MPP-GCs synapses was accompanied by heterosynaptic NMDAR-LTP at non-  
117 stimulated distal LPP-GC synapses. Conversely, homosynaptic AMPAR-LTP at MPP-GC

118 synapses was accompanied by heterosynaptic AMPAR-LTD at LPP-GC synapses. Both homo-  
119 and heterosynaptic NMDAR-LTP were blocked by GluN2D antagonism. Thus, our study provides  
120 the first direct evidence of heterosynaptic LTP of NMDAR-mediated transmission. This novel form  
121 of NMDAR-LTP may contribute to dentate gyrus-dependent forms of memory.

122

## 123 **METHODS**

### 124 **Experimental Model and Subject Details**

125 Postnatal day 19 (P19) to P29 Sprague-Dawley rats and C57BL/6 mice P30 to P60 of either sex  
126 were used for electrophysiological experiments. All animals were group housed in a standard  
127 12 hr light/12 hr dark cycle. Animal handling and use followed a protocol approved by the Animal  
128 Care and Use Committee of Albert Einstein College of Medicine, in accordance with the National  
129 Institutes of Health guidelines.

### 130 **Hippocampal slice preparation**

131 Acute transverse hippocampal slices (300-400  $\mu\text{m}$  thick) were prepared from Sprague-Dawley  
132 rats and C57BL/6 mice (300  $\mu\text{m}$  thick). Briefly, the hippocampi were isolated and cut using a  
133 VT1200s microslicer (Leica Microsystems Co.) in a solution containing (in mM): 215 sucrose,  
134 2.5 KCl, 26  $\text{NaHCO}_3$ , 1.6  $\text{NaH}_2\text{PO}_4$ , 1  $\text{CaCl}_2$ , 4  $\text{MgCl}_2$ , 4  $\text{MgSO}_4$  and 20 D-glucose. At 30 min post  
135 sectioning, the cutting medium was gradually switched to extracellular artificial cerebrospinal  
136 (ACSF) recording solution containing (in mM): 124 NaCl, 2.5 KCl, 26  $\text{NaHCO}_3$ , 1  $\text{NaH}_2\text{PO}_4$ , 2.5  
137  $\text{CaCl}_2$ , 1.3  $\text{MgSO}_4$  and 10 D-glucose. Slices were incubated for at least 45 min at room  
138 temperature in the ACSF solution before recording.

### 139 **Electrophysiology**

140 All experiments, unless otherwise stated, were performed at  $28 \pm 1^\circ\text{C}$  in a submersion-type  
141 recording chamber perfused at  $\sim 2 \text{ mL min}^{-1}$  with ACSF. Whole-cell patch-clamp recordings using  
142 a Multiclamp 700A amplifier (Molecular Devices) were made from GCs voltage clamped at  
143  $-45 \text{ mV}$  (unless otherwise stated) using patch-type pipette electrodes ( $\sim 3\text{-}4 \text{ M}\Omega$ ) containing (in  
144 mM): 135 K-Gluconate, 5 KCl, 0.1 EGTA, 0.04  $\text{CaCl}_2$ , 5 NaOH, 5 NaCl, 10 HEPES, 5 MgATP,  
145 0.4  $\text{Na}_3\text{GTP}$ , and 10 D-glucose, pH 7.2 (280-290 mOsm). Series resistance ( $\sim 7\text{-}25 \text{ M}\Omega$ ) was  
146 monitored throughout all experiments with a  $-5 \text{ mV}$ , 80 ms voltage step, and cells that exhibited  
147 a significant change in series resistance ( $> 20\%$ ) were excluded from analysis.

148 In order to stimulate MPP and LPP inputs to GCs, stimulating patch-type pipettes were placed in  
149 the middle third of the medial molecular layer, and in the distal part of the outer molecular layer  
150 of the dentate gyrus, respectively. To elicit synaptic responses, monopolar square-wave voltage  
151 or current pulses (100–200  $\mu$ s pulse width, 4–25 V or 20–100  $\mu$ A) were delivered through a  
152 stimulus isolator (Isoflex, AMPI, or Digitimer DS2A-MKII) connected to a broken tip (~10–20  $\mu$ m)  
153 stimulating patch-type micropipette filled with ACSF. Typically, stimulation was adjusted to obtain  
154 comparable magnitude synaptic responses across experiments; e.g., 40–100 pA NMDAR-EPSCs  
155 ( $V_h$  –45 mV). Burst-timing NMDAR plasticity was typically induced in current clamp mode ( $V_{rest}$   
156 ~ –60 to –70 mV) by pairing presynaptic bursts (6 pulses at 50 Hz) and postsynaptic burst of action  
157 potentials (5 action potentials at 100 Hz) delivered at 10 ms interval, for 100 times at 2 Hz.

### 158 **Data analysis**

159 Electrophysiological data were acquired at 5 kHz, filtered at 2.4 kHz, and analyzed using custom-  
160 made software for IgorPro (Wavemetrics Inc.). The magnitude of LTP was determined by  
161 comparing 10 min baseline responses with responses 20–30 min after LTP induction.

### 162 **Reagents**

163 Reagents were bath applied following dilution into ACSF from stock solutions stored at –20 °C  
164 prepared in water or DMSO, depending on the manufacturers' recommendation. Final DMSO  
165 concentration was < 0.01% total volume. Cyclopiazonic acid, heparin, ryanodine, DQP-1105,  
166 QNZ46, D-APV, and MPEP were purchased from Tocris Biosciences. NBQX was purchased from  
167 Cayman Chemical Co, while BAPTA, picrotoxin and all salts for making ACSF and internal  
168 solutions were purchased from Sigma-Millipore.

### 169 **Quantification and Statistical Analysis**

170 Statistical analysis was performed using OriginPro software (OriginLab). The normality of  
171 distributions was assessed using the Shapiro-Wilk test. In normal distributions, Student's unpaired  
172 and paired two-tailed t tests were used to assess between-group and within-group differences,  
173 respectively. The non-parametric paired sample Wilcoxon signed rank test and Mann-Whitney's  
174 U test were used in non-normal distributions. Statistical significance was set to  $p < 0.05$   
175 (\*\* indicates  $p < 0.001$ , \*\* indicates  $p < 0.01$ , and \* indicates  $p < 0.05$ ). All values are reported as  
176 the mean  $\pm$  SEM.

177

## 178 **RESULTS**

## 179 **MPP-GC synapses express homosynaptic burst timing-dependent NMDAR-LTP**

180 Burst timing-dependent plasticity (BTDP) of NMDAR-mediated transmission has been reported in  
181 the midbrain (Harnett et al., 2009) and in area CA3 of the hippocampus (Hunt et al., 2013),  
182 whereas early work utilized high frequency stimulation of MPP axons to elicit NMDAR-LTP at  
183 MPP-GC synapses (O'Connor et al., 1994). BTDP mimics *in vivo* activity in the entorhinal cortex  
184 (Latuske et al., 2015; Ebbesen et al., 2016; Csordas et al., 2020) and dentate gyrus (Pernia-  
185 Andrade and Jonas, 2014; Diamantaki et al., 2016; Senzai and Buzsaki, 2017), so we aimed to  
186 test whether pre (MPP axons) – post (GC) burst pairing stimulation could trigger homosynaptic  
187 LTP of NMDAR-mediated transmission at MPP-GC synapses. To isolate NMDAR-mediated  
188 transmission, whole-cell patch-clamp recordings of GCs (holding potential [V<sub>h</sub>] = -45 mV) were  
189 performed in the presence of 10 μM NBQX and 100 μM picrotoxin to block AMPAR- and GABA<sub>A</sub>  
190 receptor-mediated transmission, respectively. NMDAR excitatory postsynaptic currents (EPSCs)  
191 were evoked using electrical stimulation with a micropipette placed in the medial molecular layer  
192 (MML) of the dentate gyrus (see Methods). After 10 minutes of baseline response, a presynaptic  
193 (6 pre pulses at 50 Hz) – postsynaptic (5 post pulses at 100 Hz) burst firing pairing protocol with  
194 a 10 ms interval, repeated 100 times, was delivered in current clamp mode (holding potential [V<sub>h</sub>]  
195 = ~-60 to -70 mV). We found that pre-post burst stimulation induced a robust homosynaptic  
196 NMDAR-LTP at MPP-GC synapses, whereas a post-pre pairing sequence had no long-term effect  
197 on NMDAR-mediated synaptic transmission (Fig. 1A). In addition, presynaptic and postsynaptic  
198 bursts alone did not elicit any NMDAR plasticity (Fig. 1B). Altogether, these results revealed that  
199 physiologically relevant patterns of activity trigger robust homosynaptic NMDAR-LTP at MPP-GC  
200 synapses, and that burst timing-induced LTP is restricted to pre-post pairings.

201 Previous work demonstrated that NMDAR-LTP at CNS synapses (Hunt and Castillo, 2012),  
202 including MPP-GC synapses (O'Connor et al., 1994; Hamey et al., 2006), relies on a postsynaptic  
203 mechanism of induction that includes NMDAR and type 5 metabotropic glutamate receptor  
204 (mGluR5) co-activation and a rise in postsynaptic [Ca<sup>2+</sup>]. We found that bath application of the  
205 mGluR5 antagonist MPEP (4 μM) (Fig. 2A) and intracellular loading of the Ca<sup>2+</sup> chelating agent  
206 BAPTA (10 mM) abolished LTP (Fig. 2B), indicating that both mGluR5 and postsynaptic calcium  
207 are also required for pre-post burst-induced NMDAR LTP at MPP-GC synapses.

208

## 209 **LPP-GC synapses express robust heterosynaptic NMDAR LTP but heterosynaptic AMPAR** 210 **LTD**

211 We next tested whether induction of burst timing-dependent NMDAR-LTP at MPP-GC synapses  
212 could heterosynaptically induce plasticity at distal LPP-GC synapses. Some forms of  
213 heterosynaptic plasticity are compensatory in nature –e.g., homosynaptic LTP can result in  
214 heterosynaptic LTD at neighboring synapses (Chistiakova et al., 2014; Chater and Goda, 2021).  
215 To test for NMDAR heterosynaptic plasticity, NMDAR-EPSCs were monitored in the same GC in  
216 response to MPP and LPP stimulation, by placing stimulation micropipettes in MML and the most  
217 distal border of the outer molecular layer (OML) of the dentate gyrus, respectively. Both  
218 stimulation pipettes were placed on the same side of the GC to activate similar dendritic branches.  
219 After a 10-min baseline recording, pre-post burst stimulation was applied at MPP-GC synapses  
220 as previously described (Figs. 1 and 2). Surprisingly, we found that homosynaptic MPP-GC  
221 NMDAR-LTP was accompanied by heterosynaptic NMDAR-LTP at LPP-GC synapses (Fig. 3A  
222 and B). Because single dendritic branches perform local computations and may act as  
223 fundamental functional units of a neuron (Branco and Hausser, 2010), we hypothesized that the  
224 postsynaptic signaling that mediates heterosynaptic plasticity could be restricted to the dendritic  
225 branches expressing homosynaptic LTP. To test this possibility, we placed the LPP stimulation  
226 pipette on the other side of the recorded GC, which is expected to activate LPP inputs onto  
227 different dendritic branches. We found that these LPP inputs did not express any heterosynaptic  
228 plasticity (Fig. 3C). Moreover, application of the pre-post burst stimulation protocol at LPP-GC  
229 synapses did not induce any form of homosynaptic NMDAR plasticity (Fig. 3D). To test whether  
230 homosynaptic MPP-GC NMDAR-LTP and heterosynaptic LPP-GC NMDAR-LTP could also be  
231 observed in mice, we repeated the experiment reported in figure 3A,B in acute mouse  
232 hippocampal slices. Both forms of NMDAR plasticity were also present in mice (Fig. 3E),  
233 suggesting a conserved plasticity mechanism. Altogether, these results revealed that MPP and  
234 LPP synaptic inputs onto GCs undergo distinct forms of NMDAR plasticity. While pre-post burst  
235 stimulation induced homosynaptic NMDAR-LTP at MPP inputs, only heterosynaptic NMDAR-LTP  
236 was observed at LPP inputs.

237 We wondered whether the homosynaptic and heterosynaptic BTDP we observed was unique to  
238 NMDARs, or it could also be expressed by AMPARs. While virtually nothing was known about  
239 NMDAR heterosynaptic plasticity, several reports showed that AMPARs can undergo  
240 heterosynaptic changes in neighboring synapses (Chistiakova et al., 2014; Chater and Goda,  
241 2021). Yet, only a handful of *in vivo* studies with mixed results have investigated heterosynaptic  
242 AMPAR plasticity in the dentate gyrus (Abraham et al., 2007; Bromer et al., 2018; Jungenitz et  
243 al., 2018) and, to our knowledge, no *in vitro* study has characterized any form of functional  
244 heterosynaptic AMPAR plasticity at LPP-GC synapses. To address this knowledge gap, we

245 monitored AMPAR-EPSCs at both MPP- and LPP-GC synapses in the same GC ( $V_h = -60$  mV),  
246 in presence of the GABA<sub>A</sub> receptor antagonist picrotoxin (100  $\mu$ M). After establishing a baseline,  
247 we applied pre-post burst stimulation at MPP-GC synapses and found that AMPAR-EPSCs  
248 express homosynaptic LTP at MPP-GC synapses but heterosynaptic AMPAR-LTD at LPP-GC  
249 synapses (Fig. 3F). These results suggest that BTDP modifies the relative contribution of AMPA  
250 and NMDA receptors at MPP and LPP synaptic inputs.

251

### 252 **Internal Ca<sup>2+</sup> stores are required for heterosynaptic but not homosynaptic NMDAR-LTP**

253 Previous work by our lab showed that internal Ca<sup>2+</sup> stores contribute to the expression of  
254 homosynaptic NMDAR-LTP at mossy fiber to CA3 pyramidal cell synapses (Hunt et al., 2013).  
255 We then tested the role of internal Ca<sup>2+</sup> stores in both homosynaptic and heterosynaptic NMDAR-  
256 LTP at GC synapses. To this end, we used the cell-permeable inhibitor of sarcoplasmic reticulum  
257 Ca<sup>2+</sup>-ATPase, cyclopiazonic acid (CPA 30  $\mu$ M, 40-50 min pre-incubation, also included in the  
258 perfusion) to deplete internal Ca<sup>2+</sup> stores. We found that CPA abolished the induction of LPP-GC  
259 heterosynaptic plasticity (Fig. 4A) but had no effect on MPP-GC homosynaptic plasticity (Fig. 4B).  
260 Internal Ca<sup>2+</sup> can be released from endoplasmic reticulum (ER) stores via IP3 signaling or  
261 ryanodine receptor activation. To determine which of these mechanisms is required for  
262 heterosynaptic NMDAR-LTP, we loaded GCs with heparin (2 mg/ml) to block IP3- mediated Ca<sup>2+</sup>  
263 release, or incubated (40-50 min) and perfused hippocampal slices with ryanodine (100  $\mu$ M) to  
264 block ryanodine receptor-mediated Ca<sup>2+</sup> release. We found that induction of heterosynaptic LPP-  
265 GC NMDAR-LTP was abolished by ryanodine (Fig. 4C) but normally induced in presence of  
266 heparin (fig. 4C), suggesting that heterosynaptic LTP requires ryanodine but not IP3 receptors. In  
267 contrast, homosynaptic NMDAR-LTP at MPP-GC was normally induced in presence of both  
268 ryanodine and heparin (Fig. 4D), indicating that the rise in postsynaptic Ca<sup>2+</sup> at MPP-GC synapses  
269 is independent of internal Ca<sup>2+</sup> stores. Taken together, these results show that homosynaptic vs.  
270 heterosynaptic NMDAR-LTP have unique Ca<sup>2+</sup> requirements for induction, where internal Ca<sup>2+</sup>  
271 release is required only for heterosynaptic NMDAR-LTP at LPP-GC synapses. By triggering  
272 ryanodine receptor-dependent release of Ca<sup>2+</sup> from internal stores, homosynaptic MPP-GC  
273 NMDAR-LTP could change LPP-GC synaptic plasticity rules.

274

275 **Homosynaptic and heterosynaptic NMDAR-LTP are likely mediated by the synaptic**  
276 **recruitment of GluN2D-containing receptors**



277 Previous studies reported that HFS-induced homosynaptic NMDAR-LTP at MPP-GC synapses is  
278 mediated by the recruitment of GluN2D-containing NMDARs to the synapse (Lozovaya et al.,  
279 2004; Harney et al., 2008). To assess the role of GluN2D subunits in burst timing-dependent  
280 homosynaptic and heterosynaptic NMDAR-LTP, we used two different non-competitive, activity-  
281 dependent GluN2C/GluN2D selective antagonists, DQP-1105 and QNZ46 (Hansen and  
282 Traynelis, 2011; Monaghan et al., 2012). Although these antagonists may not distinguish between  
283 GluN2C- and GluN2D-containing NMDARs, GluN2C expression in the adult hippocampus (Sanz-  
284 Clemente et al., 2013), and neurons in general (Alsaad et al., 2019), is negligible. We first tested  
285 the effect of DQP-1105 on both homosynaptic MPP-GC and heterosynaptic LPP-GC NMDAR-  
286 LTP, and found that bath application of 30  $\mu$ M DQP-1105 abolished both homosynaptic and  
287 heterosynaptic plasticity (Fig. 5A,B). Most evidence indicates that GluN2D-containing receptors  
288 are mainly extrasynaptic in adult animals (Cull-Candy et al., 2001; Paoletti et al., 2013).  
289 Consistent with this notion, bath application of the antagonists DQP-1105 or QNZ46 (30  $\mu$ M) had  
290 no effect on MPP- and LPP-GC basal synaptic transmission, whereas the non-selective NMDAR  
291 antagonist D-APV abolished these responses (50  $\mu$ M) (Fig. 5C,D). Using not so selective  
292 pharmacology for GluN2D-containing receptors, it has been suggested that these receptors could  
293 be recruited to the synapse upon activity and mediate NMDAR-LTP (Harney et al., 2008). If so,  
294 the contribution of GluN2D-containing receptors to NMDAR-mediated transmission should  
295 increase after LTP induction. Remarkably, application of the selective GluN2D antagonists (DQP-  
296 1105 or QNZ46, 30  $\mu$ M) 30 min after the induction of MPP-GC NMDAR-LTP significantly  
297 decreased both MPP-GC and LPP-GC NMDAR-mediated transmission (Fig. 5E,F). These data  
298 strongly suggest that both homo and heterosynaptic NMDAR-LTP in the dentate gyrus are due to  
299 the recruitment of GluN2D-containing receptors to the synapse.

300

## 301 **DISCUSSION**

302 In this study, we discovered that pairing physiologically relevant patterns of pre and postsynaptic  
303 burst activity induced homosynaptic LTP of NMDAR-mediated transmission at MPP-GC  
304 synapses. Unexpectedly, this BTDP also triggered robust heterosynaptic NMDAR-LTP at non-  
305 stimulated LPP-GC synapses. In contrast, the same induction protocol that triggered homo- and  
306 heterosynaptic NMDAR-LTP, elicited homosynaptic MPP-GC AMPAR-LTP, but heterosynaptic  
307 LPP-GC AMPAR-LTD. Heterosynaptic NMDAR-LTP required  $Ca^{2+}$  release from internal stores,  
308 implicating long-range signaling via the ER. Furthermore, homosynaptic and heterosynaptic  
309 NMDAR-LTP increased the sensitivity to GluN2D antagonism, suggesting the synaptic

310 recruitment of GluN2D-containing NMDARs as expression mechanism. Collectively, our findings  
311 describe a novel activity-dependent synaptic mechanism whereby distinct entorhinal inputs  
312 interact functionally to regulate the dentate gyrus output.

313

### 314 **Activity induces homosynaptic NMDAR-LTP at MPP-GC but not at LPP-GC synapses**

315 BTDP of NMDAR-mediated transmission was previously reported in midbrain dopamine neurons  
316 (Harnett et al., 2009) and in GC-CA3 synapses (Hunt et al., 2013). *In vivo* recordings showed that  
317 medial entorhinal cortex neurons fire bursts of action potentials (Latuske et al., 2015; Ebbesen et  
318 al., 2016; Csordas et al., 2020), and GCs which normally fire sparsely, can generate high  
319 frequency bursts of back propagating action potentials (Pernia-Andrade and Jonas, 2014;  
320 Diamantaki et al., 2016; Senzai and Buzsaki, 2017). In the present study, we found that pairing  
321 pre and postsynaptic burst activity selectively induced homosynaptic NMDAR-LTP at MPP-GC.  
322 Consistent with previous findings, this NMDAR-LTP was postsynaptically expressed, and  
323 required a rise in postsynaptic  $Ca^{2+}$  (Hunt and Castillo, 2012), and NMDAR and mGluR5 co-  
324 activation (Jia et al., 1998; Harney et al., 2006; Kwon and Castillo, 2008; Rebola et al., 2008;  
325 Harnett et al., 2009). In contrast, the BTDP paradigm did not induce homosynaptic plasticity at  
326 LPP-GC synapses. This finding might be explained by a strong dendritic attenuation of  
327 backpropagating action potentials as a function of distance from the soma (Krueppel et al., 2011;  
328 Kim et al., 2018). Also, as in distal synapses of other pyramidal neurons (Larkum et al., 2001;  
329 Sjostrom and Nelson, 2002), backpropagating action potentials may not be sufficient to unblock  
330 NMDARs at LPP-GCs. In a recent study, a more standard pre-post pairing protocol (i.e., single  
331 action potentials and synaptic responses) also failed to elicit LPP-GC AMPAR plasticity, whereas  
332 this plasticity was induced with a theta-burst stimulation of LPP inputs that generated local  
333 dendritic spikes (Kim et al., 2018). Our data focusing on NMDAR-mediated transmission support  
334 the idea that synaptic plasticity rules at proximal and distal inputs onto GCs differ.

335

### 336 **MPP-GC burst activity triggers opposite heterosynaptic LPP-GC plasticity of NMDAR- and** 337 **AMPA-mediated transmission**

338 To our knowledge, we provide the first evidence for heterosynaptic NMDAR plasticity. Given the  
339 unique properties of the NMDAR, which can result in signal amplification, temporal summation,  
340 and increased  $Ca^{2+}$  influx (Hunt and Castillo, 2012), it is expected that NMDAR potentiation

341 modifies the dendritic properties of GCs at distal LPP inputs during the expression of  
342 heterosynaptic NMDAR LTP. Unlike NMDAR-mediated transmission, AMPAR potentiation at  
343 MPP-GC synapses was accompanied by heterosynaptic AMPAR-LTD at LPP-GC synapses.  
344 Similar heterosynaptic LTD of AMPAR-mediated transmission has been reported before at many  
345 other synapses (Lynch et al., 1977; Chistiakova et al., 2014; Chater and Goda, 2021). Our findings  
346 provide further evidence that NMDARs and AMPARs have opposite heterosynaptic plasticity  
347 rules, which might impact dendritic integration by GCs.

348

### 349 **Homosynaptic and heterosynaptic NMDAR-LTP are mediated by GluN2D recruitment**

350 A role for GluN2D-containing NMDARs in plasticity has been previously described at several  
351 synapses (Harney et al., 2008; Krause et al., 2008; Dubois and Liu, 2021; Eapen et al., 2021). As  
352 reported at MPP-GC synapses (Harney et al., 2008), we found that the maintenance of both  
353 homosynaptic MPP-GC and heterosynaptic LPP-GC NMDAR-LTP were blocked by GluN2D-  
354 subunit antagonists, suggesting that both forms of plasticity require recruitment of GluN2D-  
355 containing receptors to the synapse, presumably forming di- (GluN1/GluN2D) or tri-  
356 (GluN1/GluN2D/GluN2B) heteromers. In any case, the functional properties differ from those of  
357 diheteromeric GluN1/2B receptors (Yi et al., 2019). While the recruitment of heteromeric GluN2D-  
358 containing receptors could result in a NMDAR-EPSC with a slower decay (Cull-Candy et al., 2001;  
359 Hansen and Traynelis, 2011; Sanz-Clemente et al., 2013), no differences in NMDAR-EPSC decay  
360 were observed before and after LTP (Harney et al., 2008). Importantly, an important property of  
361 GluN2D-containing diheteromeric receptors is the low sensitivity to  $Mg^{2+}$  blockade relative to  
362 GluN2A or GluN2B-containing receptors (Paoletti et al., 2013). Although at distal synapses  
363 backpropagating APs may not be sufficient to remove the NMDAR  $Mg^{2+}$  block (Larkum et al.,  
364 2001; Sjostrom and Nelson, 2002), expression of GluN2D-containing NMDARs after NMDAR-  
365 LTP induction may be one factor that helps explain why NMDARs exhibit different synaptic  
366 plasticity learning rules than AMPARs. Notably, heterosynaptic changes in NMDAR subunit  
367 composition have been previously reported in CA1 neurons (Han and Heinemann, 2013).  
368 GluN2D-mediated synaptic transmission has been reported in hippocampal interneurons of adult  
369 mice (von Engelhardt et al., 2015), but whether activity modulates the expression of synaptic  
370 GluN2D-containing NMDARs is unclear. An increase in GluN2D subunit recruitment, which is  
371 expected to modify NMDAR properties and function (Yashiro and Philpot, 2008; Paoletti et al.,  
372 2013), suggests that long-term potentiation of NMDAR-mediated transmission could impact other  
373 forms of Hebbian plasticity.

374

### 375 **Homosynaptic vs. heterosynaptic NMDAR-LTP have unique Ca<sup>2+</sup> requirements**

376 Mechanistically, the induction and expression of NMDAR plasticity share common properties  
377 across synapses (Rebola et al., 2010; Hunt and Castillo, 2012), including postsynaptic NMDAR-  
378 mediated Ca<sup>2+</sup> influx and Ca<sup>2+</sup> release from internal stores. Our data shows that while  
379 homosynaptic NMDAR-LTP requires a rise in postsynaptic Ca<sup>2+</sup>, it is insensitive to  
380 pharmacological depletion of internal Ca<sup>2+</sup> stores, suggesting that at MPP-GC synapses the  
381 postsynaptic Ca<sup>2+</sup> rise via NMDARs and action potential firing is sufficient to induce plasticity. In  
382 contrast, we found that depletion of Ca<sup>2+</sup> internal stores abolished heterosynaptic NMDAR-LTP,  
383 and that internal Ca<sup>2+</sup> release from stores is mediated by ryanodine receptors. These data strongly  
384 suggest that homosynaptic NMDAR-LTP can change the synaptic rules at distal LPP-GC  
385 synapses, in part by eliciting the release of internal ER Ca<sup>2+</sup> stores. While homosynaptic NMDAR-  
386 LTP at MF-CA3 synapses requires IP3-dependent Ca<sup>2+</sup> release (Kwon and Castillo, 2008; Hunt  
387 et al., 2013), there is evidence in the amygdala that heterosynaptic, but not homosynaptic  
388 plasticity requires ryanodine-dependent Ca<sup>2+</sup> release from internal stores (Royer and Pare, 2003),  
389 and ryanodine-dependent Ca<sup>2+</sup> release can significantly alter the induction requirements of  
390 synaptic plasticity in GCs (Wang et al., 1996). Additionally, in mesolimbic dopamine neurons  
391 exposed to alcohol, increased susceptibility to induce NMDAR-LTP is dependent on Ca<sup>2+</sup> release  
392 from ER stores (Bernier et al., 2011). Notably, EM studies of pyramidal hippocampal neurons  
393 show that the smooth ER extends to distal dendrites and dendritic spines (Spacek and Harris,  
394 1997). The coincident increase in Ca<sup>2+</sup> release from the ER, along with increased GluN2D  
395 recruitment to ease the Mg<sup>2+</sup> block, might provide an ideal scenario for the induction and  
396 expression of heterosynaptic NMDAR LTP at distal synapses. Future *in vivo* Ca<sup>2+</sup> imaging studies  
397 in combination with genetic strategies might help resolve exactly how these two events converge  
398 to mediate heterosynaptic plasticity and potentially contribute to dentate gyrus-dependent  
399 learning.

400

401 In summary, BTDP of NMDAR-mediated transmission at MPP synapses can exert long-term,  
402 powerful control over NMDAR transmission at distal LPP-GC synapses. Dynamic changes in  
403 NMDAR transmission could shift the induction threshold of NMDAR-dependent forms of plasticity,  
404 as previously observed in CA3 neurons, where NMDARs can selectively adjust synapses in a  
405 heterosynaptic manner (Tsukamoto et al., 2003), act as a metaplastic switch for AMPAR-

406 mediated plasticity (Astori et al., 2010; Rebola et al., 2011) and contribute to metaplasticity of  
407 AMPAR LTP (Hunt et al., 2013). Further work is required to determine whether homo- and  
408 heterosynaptic NMDAR potentiation occurs in behaving animals, and its contribution to dentate  
409 gyrus-dependent memory processes such as pattern separation (McHugh et al., 2007).

410

411 **FIGURE LEGENDS**

412 **Figure 1: MPP-GC synapses express homosynaptic burst timing-dependent NMDAR-LTP**

413 (A) Left, Diagram illustrating the recording configuration. MPP NMDAR EPSCs were recorded  
414 from GC and evoked with a stimulating electrode placed in the middle molecular layer (MML) of  
415 the dentate gyrus. Middle, Representative average traces before (1) and after (2) pairing protocol  
416 application. Right, Time-course summary plot showing how pairing pre- and postsynaptic activity  
417 (pre-post: 6 pre pulses at 50 Hz followed by 5 post pulses at 100 Hz with a 10 ms interval, repeated  
418 100 times every 0.5 s) induced a robust NMDAR-LTP at MPP-GC synapses (white circles,  $159.5$   
419  $\pm 7.3$  %,  $p < 0.001$ ,  $n = 6$ , paired t-test). In contrast, post-pre protocol (post-pre: 5 post pulses at  
420 100 Hz followed by 6 pre pulses at 50 Hz with a 10 ms interval, repeated 100 times every 0.5 s)  
421 resulted did not change NMDAR EPSC amplitude (black circles,  $96.9 \pm 5.3$  %,  $p = 0.58$ ,  $n = 7$ ,  
422 paired t-test). Pairing protocol was delivered at the time point indicated by the vertical arrow.  
423 (B) Representative traces and summary plot showing how neither presynaptic (black circles, pre  
424 only,  $p = 0.51$ ,  $n = 3$ , paired t-test) nor postsynaptic (white circles, post only,  $p = 0.89$ ,  $n = 9$ , paired  
425 t-test) bursts alone elicited any long-lasting change in NMDAR EPSC amplitude.  
426 Numbers in parentheses indicate the number of cells. Summary data represent mean  $\pm$  s.e.m.

427

428 **Figure 2: MPP-GC burst timing-dependent NMDAR-LTP requires mGluR5 activation and**  
429 **postsynaptic calcium.**

430 (A) Bath application of the mGluR5 antagonist MPEP ( $4 \mu\text{M}$ ) significantly reduced homosynaptic  
431 NMDAR LTP (black circles,  $107.6 \pm 2.4$  %,  $n = 5$ ) as compared to interleaved controls (white  
432 circles,  $154.3 \pm 9.5$  %,  $p < 0.01$ ,  $n = 5$ , paired t-test; MPEP vs control:  $p < 0.01$ , unpaired t-test).  
433 (B) Intracellular loading of the  $\text{Ca}^{2+}$  chelating agent BAPTA ( $10 \text{ mM}$ ) abolished NMDAR-LTP  
434 (black circles,  $98.9 \pm 3.4$  %,  $p = 0.76$ ,  $n = 4$ , paired t-test) relative to controls (white circles,  $151.7$   
435  $\pm 11.4$  %,  $p < 0.01$ ,  $n = 6$ , paired t-test; BAPTA vs control:  $p < 0.01$ , unpaired t-test).

436 Numbers in parentheses indicate the number of cells. Summary data represent mean  $\pm$  s.e.m.

437

438 **Figure 3: LPP-GC synapses express heterosynaptic NMDAR-LTP but heterosynaptic**  
439 **AMPA-LTD**

440 (A) Left, Diagram illustrating the recording configuration. MPP and LPP NMDAR EPSCs were  
441 recorded from the same GC. The LPP stimulation micropipette was placed in the most distal  
442 border of the outer molecular layer, directly above the MPP stimulation micropipette, which was  
443 positioned within the MML of the dentate gyrus.

444 (B) Left, Representative average traces. Right, Time-course summary plot showing how pre-post  
445 pairing protocol induced at MPP (6 pre pulses at 50 Hz followed by 5 post pulses at 100 Hz with  
446 a 10 ms interval, repeated 100 times every 0.5 s), resulted in homosynaptic NMDAR-LTP at MPP-  
447 GC synapses (white circles,  $153.1 \pm 7.9$  %,  $p < 0.001$ ,  $n = 11$ , paired t-test), accompanied by  
448 heterosynaptic NMDAR-LTP at distal LPP-GC synapses (black circles,  $137.2 \pm 5.1$  %,  $p < 0.001$ ,  
449  $n = 11$ , paired t-test).

450 (C) Left, diagram illustrating recording configuration. MPP and LPP NMDAR EPSCs were  
451 recorded from the same GC. LPP stimulation micropipette was placed on the distal OML, at least  
452 250  $\mu\text{m}$  lateral from the location of the MPP stimulation micropipette. Right, summary plot showing  
453 that pre-post pairing elicited homosynaptic LTP at MPP-GC synapses (white circles,  $138.4 \pm 3.7$   
454 %,  $p < 0.01$ ,  $n = 3$ , paired t-test) while it did not trigger any change in heterosynaptic LPP NMDAR  
455 EPSC amplitude under these conditions (black circles,  $101.4 \pm 6.6$  %,  $p = 0.85$ ,  $n = 3$ , paired t-  
456 test).

457 (D) Left, Diagram illustrating the recording configuration. LPP NMDAR EPSCs were recorded  
458 from GC and evoked with stimulating electrodes placed in OML of the dentate gyrus. Right,  
459 summary data showing how Pre-post pairing protocol failed to elicit homosynaptic NMDAR LTP  
460 at LPP-GC synapses ( $98.1 \pm 4.6$  %,  $p = 0.71$ ,  $n = 4$ , paired t-test).

461 (E) Summary data obtained from experiments performed in acute mouse hippocampal slices,  
462 shows that heterosynaptic NMDAR LTP at DGCs is a conserved phenomenon. Pre-post pairing  
463 protocol induced at MML, resulted in homosynaptic NMDAR-LTP at MPP-GC synapses (white  
464 circles,  $155.8 \pm 11.3$  %,  $p < 0.01$ ,  $n = 6$ , paired t-test), accompanied by heterosynaptic LTP at  
465 distal LPP-GC synapses (black circles,  $134.5 \pm 6.8$  %,  $p < 0.01$ ,  $n = 5$ , paired t-test).

466 (F) Left, Diagram illustrating the recording configuration. MPP and LPP AMPAR EPSCs were  
467 recorded from the same GC. Right, Time-course summary plot shows that pre-post pairing  
468 protocol at MPP inputs induced homosynaptic AMPAR-LTP at MPP-GC synapses (white circles,  
469  $163.2 \pm 15.8$  %,  $p < 0.05$ ,  $n = 5$ , paired t-test), while it triggered heterosynaptic AMPAR-LTD at  
470 LPP-GC synapses (black circles,  $77.7 \pm 7.6$  %,  $p < 0.05$ ,  $n = 5$ , paired t-test).

471 Numbers in parentheses indicate the number of cells. Summary data represent mean  $\pm$  s.e.m.

472

473 **Figure 4. Internal calcium stores are required for heterosynaptic but not homosynaptic**  
474 **NMDAR-LTP.**

475 (A) Left, Diagram illustrating the recording configuration. LPP NMDAR EPSCs were recorded  
476 from GC and pre-post pairing protocol was delivered at MPP inputs. Application of the  
477 sarcoplasmic reticulum  $\text{Ca}^{2+}$ -ATPase inhibitor CPA (30  $\mu\text{M}$ , 40-50 min pre-incubation and bath  
478 application) completely abolished heterosynaptic NMDAR-LTP at LPP-GC synapses (black  
479 circles,  $106.6 \pm 3.8\%$ ,  $p = 0.13$ ,  $n = 7$ , paired t-test), relative to interleaved controls (white circles,  
480  $140.5 \pm 4.2\%$ ,  $p < 0.001$ ,  $n = 8$ , paired t-test, CPA vs control:  $p < 0.001$ , unpaired t-test).

481 (B) MPP NMDAR EPSCs were recorded from GC and pre-post pairing protocol was delivered at  
482 MPP inputs. CPA application (30  $\mu\text{M}$ , 40-50 min pre-incubation and bath application) had no effect  
483 on homosynaptic NMDAR-LTP at MPP-GC synapses (black circles,  $149.4 \pm 6.5\%$ ,  $p < 0.001$ ,  $n$   
484  $= 7$ , paired t-test, CPA vs control:  $p < 0.001$ , unpaired t-test) as compared to interleaved controls  
485 (white circles,  $151.3 \pm 7.8\%$ ,  $p < 0.001$ ,  $n = 8$ , paired t-test, CPA vs control:  $p = 0.75$ , unpaired t-  
486 test).

487 (C) LPP NMDAR EPSCs were recorded from GC and pre-post pairing protocol was delivered at  
488 MPP inputs. GCs were loaded with heparin (2 mg/ml) to block  $\text{IP}_3$ - mediated  $\text{Ca}^{2+}$  release, or  
489 slices were pre-treated (40-50 min prior to induction) and perfused during experiment with  
490 ryanodine (100  $\mu\text{M}$ ) to block ryanodine receptor-mediated  $\text{Ca}^{2+}$  release. Induction of  
491 heterosynaptic plasticity was completely blocked by ryanodine (black circles,  $101.4 \pm 4.1\%$ ,  $p =$   
492  $0.76$ ,  $n = 4$ , paired t-test, ryanodine vs control:  $p < 0.05$ , unpaired t-test), but was comparable to  
493 controls (white circles,  $135.4 \pm 5.6\%$ ,  $p < 0.001$ ,  $n = 9$ , paired t-test) in the presence of heparin  
494 (gray circles,  $124.2 \pm 4.0\%$ ,  $p < 0.01$ ,  $n = 6$ , paired t-test, heparin vs control:  $p = 0.44$ , unpaired  
495 t-test).

496 (D) MPP NMDAR EPSCs were recorded from GC and pre-post pairing protocol was delivered at  
497 MPP inputs. Inhibition of ryanodine (black circles,  $135.3 \pm 8.7\%$ ,  $p < 0.05$ ,  $n = 4$ , paired t-test;  
498 ryanodine vs control:  $p = 0.46$ , unpaired t-test) or  $\text{IP}_3$  (gray circles,  $146.5 \pm 7.1\%$ ,  $p < 0.01$ ,  $n =$   
499  $6$ , paired t-test; heparin vs control:  $p = 0.44$ , unpaired t-test) receptors had no effect on  
500 homosynaptic NMDAR-LTP at MPP-GC synapses compared to interleaved controls (white  
501 circles,  $152.6 \pm 8.9\%$ ,  $p < 0.001$ ,  $n = 9$ , paired t-test).



502 Numbers in parentheses indicate the number of cells. Summary data represent mean  $\pm$  s.e.m.

503

504 **Figure 5. Homosynaptic and heterosynaptic NMDAR-LTP are likely due to GluN2D**  
505 **recruitment to the synapse.**

506 (A) Bath application of the GluN2D antagonist DQP-1105 (30  $\mu$ M) completely abolished  
507 homosynaptic NMDAR-LTP at MPP-GC synapses (control:  $149.1 \pm 8.1$  %,  $p < 0.001$ ,  $n = 7$ , paired  
508 t-test; DQP-1105:  $95.6 \pm 8.8$  %,  $p = 0.65$ ,  $n = 4$ , paired t-test, DQP-1105 vs control:  $p < 0.01$ ,  
509 unpaired t-test).

510 (B) Induction of heterosynaptic NMDAR-LTP at LPP-GC synapses was also blocked in the  
511 presence of 30  $\mu$ M DQP-1105 (control:  $147.8 \pm 9.1$  %,  $p < 0.01$ ,  $n = 7$ , paired t-test; DQP-1105:  
512  $99.1 \pm 2.2$  %,  $p = 0.71$ ,  $n = 4$ , paired t-test, DQP-1105 vs control:  $p < 0.01$ , unpaired t-test).

513 (C, D) Bath application of DQP-1105 or QNZ46 had no effect on basal NMDAR synaptic  
514 transmission at either MPP-GC (C,  $100.2 \pm 5.9$  %,  $p = 0.98$ ,  $n = 9$ , paired t-test) or LPP-GC  
515 synapses (D,  $103.4 \pm 7.7$  %,  $p = 0.67$ ,  $n = 9$ , paired t-test). Application of D-APV abolished these  
516 EPSCs, confirming these responses were mediated by NMDARs (C, MPP:  $5.3 \pm 1.6$  %,  $p <$   
517  $0.0001$ ,  $n = 5$ , paired t-test; D, LPP:  $9.0 \pm 3.7$  %,  $p < 0.001$ ).

518 (E, F) Pre-post pairing LTP induction protocol was delivered at MPP inputs. Bath application of  
519 either DQP-1105 (30  $\mu$ M) or QNZ46 (30  $\mu$ M) 30 min after NMDAR-LTP induction substantially  
520 reduced both homosynaptic (E, DQP-1105 vs post-LTP:  $p < 0.05$ , unpaired t-test) and  
521 heterosynaptic (F, DQP-1105 vs post-LTP:  $p < 0.05$ , unpaired t-test) NMDAR-EPSC amplitude.

522 Numbers in parentheses indicate the number of cells. Summary data represent mean  $\pm$  s.e.m.

523

## 524 REFERENCES

- 525 Abraham WC, Logan B, Wolff A, Benuskova L (2007) "Heterosynaptic" LTD in the dentate gyrus of  
526 anesthetized rat requires homosynaptic activity. *J Neurophysiol* 98:1048-1051.
- 527 Alsaad HA, DeKorver NW, Mao Z, Dravid SM, Arikath J, Monaghan DT (2019) In the Telencephalon,  
528 GluN2C NMDA Receptor Subunit mRNA is Predominately Expressed in Glial Cells and GluN2D  
529 mRNA in Interneurons. *Neurochem Res* 44:61-77.
- 530 Amaral DG, Scharfman HE, Lavenex P (2007) The dentate gyrus: fundamental neuroanatomical  
531 organization (dentate gyrus for dummies). *Prog Brain Res* 163:3-22.
- 532 Astori S, Pawlak V, Kohr G (2010) Spike-timing-dependent plasticity in hippocampal CA3 neurons. *J Physiol*  
533 588:4475-4488.
- 534 Bernier BE, Whitaker LR, Morikawa H (2011) Previous ethanol experience enhances synaptic plasticity of  
535 NMDA receptors in the ventral tegmental area. *J Neurosci* 31:5205-5212.
- 536 Bliss TV, Lomo T (1973) Long-lasting potentiation of synaptic transmission in the dentate area of the  
537 anaesthetized rabbit following stimulation of the perforant path. *J Physiol* 232:331-356.
- 538 Branco T, Hausser M (2010) The single dendritic branch as a fundamental functional unit in the nervous  
539 system. *Curr Opin Neurobiol* 20:494-502.
- 540 Bromer C, Bartol TM, Bowden JB, Hubbard DD, Hanka DC, Gonzalez PV, Kuwajima M, Mendenhall JM,  
541 Parker PH, Abraham WC, Sejnowski TJ, Harris KM (2018) Long-term potentiation expands  
542 information content of hippocampal dentate gyrus synapses. *Proc Natl Acad Sci U S A* 115:E2410-  
543 E2418.
- 544 Chater TE, Goda Y (2021) My Neighbour Hetero-deconstructing the mechanisms underlying  
545 heterosynaptic plasticity. *Curr Opin Neurobiol* 67:106-114.
- 546 Chistiakova M, Bannon NM, Bazhenov M, Volgushev M (2014) Heterosynaptic plasticity: multiple  
547 mechanisms and multiple roles. *Neuroscientist* 20:483-498.
- 548 Colino A, Malenka RC (1993) Mechanisms underlying induction of long-term potentiation in rat medial  
549 and lateral perforant paths in vitro. *J Neurophysiol* 69:1150-1159.
- 550 Csordas DE, Fischer C, Nagele J, Stemmler M, Herz AVM (2020) Spike Afterpotentials Shape the In Vivo  
551 Burst Activity of Principal Cells in Medial Entorhinal Cortex. *J Neurosci* 40:4512-4524.
- 552 Cull-Candy S, Brickley S, Farrant M (2001) NMDA receptor subunits: diversity, development and disease.  
553 *Curr Opin Neurobiol* 11:327-335.
- 554 Diamantaki M, Frey M, Berens P, Preston-Ferrer P, Burgalossi A (2016) Sparse activity of identified dentate  
555 granule cells during spatial exploration. *Elife* 5.
- 556 Diering GH, Hugarir RL (2018) The AMPA Receptor Code of Synaptic Plasticity. *Neuron* 100:314-329.
- 557 Dubois CJ, Liu SJ (2021) GluN2D NMDA Receptors Gate Fear Extinction Learning and Interneuron Plasticity.  
558 *Front Synaptic Neurosci* 13:681068.
- 559 Eapen AV, Fernandez-Fernandez D, Georgiou J, Bortolotto ZA, Lightman S, Jane DE, Volianskis A,  
560 Collingridge GL (2021) Multiple roles of GluN2D-containing NMDA receptors in short-term  
561 potentiation and long-term potentiation in mouse hippocampal slices. *Neuropharmacology*  
562 201:108833.
- 563 Ebbesen CL, Reifenstein ET, Tang Q, Burgalossi A, Ray S, Schreiber S, Kempter R, Brecht M (2016) Cell Type-  
564 Specific Differences in Spike Timing and Spike Shape in the Rat Parasubiculum and Superficial  
565 Medial Entorhinal Cortex. *Cell Rep* 16:1005-1015.
- 566 Han EB, Heinemann SF (2013) Distal dendritic inputs control neuronal activity by heterosynaptic  
567 potentiation of proximal inputs. *J Neurosci* 33:1314-1325.
- 568 Hansen KB, Traynelis SF (2011) Structural and mechanistic determinants of a novel site for noncompetitive  
569 inhibition of GluN2D-containing NMDA receptors. *J Neurosci* 31:3650-3661.

- 570 Harnett MT, Bernier BE, Ahn KC, Morikawa H (2009) Burst-timing-dependent plasticity of NMDA receptor-  
571 mediated transmission in midbrain dopamine neurons. *Neuron* 62:826-838.
- 572 Harney SC, Rowan M, Anwyl R (2006) Long-term depression of NMDA receptor-mediated synaptic  
573 transmission is dependent on activation of metabotropic glutamate receptors and is altered to  
574 long-term potentiation by low intracellular calcium buffering. *J Neurosci* 26:1128-1132.
- 575 Harney SC, Jane DE, Anwyl R (2008) Extrasynaptic NR2D-containing NMDARs are recruited to the synapse  
576 during LTP of NMDAR-EPSCs. *J Neurosci* 28:11685-11694.
- 577 Herring BE, Nicoll RA (2016) Long-Term Potentiation: From CaMKII to AMPA Receptor Trafficking. *Annu*  
578 *Rev Physiol* 78:351-365.
- 579 Hunt DL, Castillo PE (2012) Synaptic plasticity of NMDA receptors: mechanisms and functional  
580 implications. *Curr Opin Neurobiol* 22:496-508.
- 581 Hunt DL, Puente N, Grandes P, Castillo PE (2013) Bidirectional NMDA receptor plasticity controls CA3  
582 output and heterosynaptic metaplasticity. *Nat Neurosci* 16:1049-1059.
- 583 Jia Z, Lu Y, Henderson J, Taverna F, Romano C, Abramow-Newerly W, Wojtowicz JM, Roder J (1998)  
584 Selective abolition of the NMDA component of long-term potentiation in mice lacking mGluR5.  
585 *Learn Mem* 5:331-343.
- 586 Jonas P, Lisman J (2014) Structure, function, and plasticity of hippocampal dentate gyrus microcircuits.  
587 *Front Neural Circuits* 8:107.
- 588 Jungenitz T, Beining M, Radic T, Deller T, Cuntz H, Jedlicka P, Schwarzacher SW (2018) Structural homo-  
589 and heterosynaptic plasticity in mature and adult newborn rat hippocampal granule cells. *Proc*  
590 *Natl Acad Sci U S A* 115:E4670-E4679.
- 591 Kim S, Kim Y, Lee SH, Ho WK (2018) Dendritic spikes in hippocampal granule cells are necessary for long-  
592 term potentiation at the perforant path synapse. *Elife* 7.
- 593 Knierim JJ, Neunuebel JP, Deshmukh SS (2014) Functional correlates of the lateral and medial entorhinal  
594 cortex: objects, path integration and local-global reference frames. *Philos Trans R Soc Lond B Biol*  
595 *Sci* 369:20130369.
- 596 Krause M, Yang Z, Rao G, Houston FP, Barnes CA (2008) Altered dendritic integration in hippocampal  
597 granule cells of spatial learning-impaired aged rats. *J Neurophysiol* 99:2769-2778.
- 598 Krueppel R, Remy S, Beck H (2011) Dendritic integration in hippocampal dentate granule cells. *Neuron*  
599 71:512-528.
- 600 Kwon HB, Castillo PE (2008) Long-term potentiation selectively expressed by NMDA receptors at  
601 hippocampal mossy fiber synapses. *Neuron* 57:108-120.
- 602 Larkum ME, Zhu JJ, Sakmann B (2001) Dendritic mechanisms underlying the coupling of the dendritic with  
603 the axonal action potential initiation zone of adult rat layer 5 pyramidal neurons. *J Physiol*  
604 533:447-466.
- 605 Latuske P, Toader O, Allen K (2015) Interspike Intervals Reveal Functionally Distinct Cell Populations in the  
606 Medial Entorhinal Cortex. *J Neurosci* 35:10963-10976.
- 607 Lozovaya NA, Grebenyuk SE, Tsintsadze T, Feng B, Monaghan DT, Krishtal OA (2004) Extrasynaptic NR2B  
608 and NR2D subunits of NMDA receptors shape 'superslow' afterburst EPSC in rat hippocampus. *J*  
609 *Physiol* 558:451-463.
- 610 Lynch GS, Dunwiddie T, Gribkoff V (1977) Heterosynaptic depression: a postsynaptic correlate of long-  
611 term potentiation. *Nature* 266:737-739.
- 612 Mayford M, Siegelbaum SA, Kandel ER (2012) Synapses and memory storage. *Cold Spring Harb Perspect*  
613 *Biol* 4.
- 614 McHugh TJ, Jones MW, Quinn JJ, Balthasar N, Coppari R, Elmquist JK, Lowell BB, Fanselow MS, Wilson MA,  
615 Tonegawa S (2007) Dentate gyrus NMDA receptors mediate rapid pattern separation in the  
616 hippocampal network. *Science* 317:94-99.

- 617 Monaghan DT, Irvine MW, Costa BM, Fang G, Jane DE (2012) Pharmacological modulation of NMDA  
618 receptor activity and the advent of negative and positive allosteric modulators. *Neurochem Int*  
619 61:581-592.
- 620 O'Connor JJ, Rowan MJ, Anwyl R (1994) Long-lasting enhancement of NMDA receptor-mediated synaptic  
621 transmission by metabotropic glutamate receptor activation. *Nature* 367:557-559.
- 622 Paoletti P, Bellone C, Zhou Q (2013) NMDA receptor subunit diversity: impact on receptor properties,  
623 synaptic plasticity and disease. *Nat Rev Neurosci* 14:383-400.
- 624 Pernia-Andrade AJ, Jonas P (2014) Theta-gamma-modulated synaptic currents in hippocampal granule  
625 cells in vivo define a mechanism for network oscillations. *Neuron* 81:140-152.
- 626 Rebola N, Srikumar BN, Mulle C (2010) Activity-dependent synaptic plasticity of NMDA receptors. *J Physiol*  
627 588:93-99.
- 628 Rebola N, Lujan R, Cunha RA, Mulle C (2008) Adenosine A2A receptors are essential for long-term  
629 potentiation of NMDA-EPSCs at hippocampal mossy fiber synapses. *Neuron* 57:121-134.
- 630 Rebola N, Carta M, Lanore F, Blanchet C, Mulle C (2011) NMDA receptor-dependent metaplasticity at  
631 hippocampal mossy fiber synapses. *Nat Neurosci* 14:691-693.
- 632 Richter-Levin G, Canevari L, Bliss TV (1995) Long-term potentiation and glutamate release in the dentate  
633 gyrus: links to spatial learning. *Behav Brain Res* 66:37-40.
- 634 Royer S, Pare D (2003) Conservation of total synaptic weight through balanced synaptic depression and  
635 potentiation. *Nature* 422:518-522.
- 636 Sanz-Clemente A, Nicoll RA, Roche KW (2013) Diversity in NMDA receptor composition: many regulators,  
637 many consequences. *Neuroscientist* 19:62-75.
- 638 Schmidt-Hieber C, Jonas P, Bischofberger J (2007) Subthreshold dendritic signal processing and  
639 coincidence detection in dentate gyrus granule cells. *J Neurosci* 27:8430-8441.
- 640 Senzai Y, Buzsaki G (2017) Physiological Properties and Behavioral Correlates of Hippocampal Granule  
641 Cells and Mossy Cells. *Neuron* 93:691-704 e695.
- 642 Sjöstrom PJ, Nelson SB (2002) Spike timing, calcium signals and synaptic plasticity. *Curr Opin Neurobiol*  
643 12:305-314.
- 644 Spacek J, Harris KM (1997) Three-dimensional organization of smooth endoplasmic reticulum in  
645 hippocampal CA1 dendrites and dendritic spines of the immature and mature rat. *J Neurosci*  
646 17:190-203.
- 647 Takeuchi T, Duzsikiewicz AJ, Morris RG (2014) The synaptic plasticity and memory hypothesis: encoding,  
648 storage and persistence. *Philos Trans R Soc Lond B Biol Sci* 369:20130288.
- 649 Tsukamoto M, Yasui T, Yamada MK, Nishiyama N, Matsuki N, Ikegaya Y (2003) Mossy fibre synaptic NMDA  
650 receptors trigger non-Hebbian long-term potentiation at entorhino-CA3 synapses in the rat. *J*  
651 *Physiol* 546:665-675.
- 652 von Engelhardt J, Bocklisch C, Tonges L, Herb A, Mishina M, Monyer H (2015) GluN2D-containing NMDA  
653 receptors-mediate synaptic currents in hippocampal interneurons and pyramidal cells in juvenile  
654 mice. *Front Cell Neurosci* 9:95.
- 655 Wang Y, Wu J, Rowan MJ, Anwyl R (1996) Ryanodine produces a low frequency stimulation-induced NMDA  
656 receptor-independent long-term potentiation in the rat dentate gyrus in vitro. *J Physiol* 495 ( Pt  
657 3):755-767.
- 658 Yashiro K, Philpot BD (2008) Regulation of NMDA receptor subunit expression and its implications for LTD,  
659 LTP, and metaplasticity. *Neuropharmacology* 55:1081-1094.
- 660 Yi F, Bhattacharya S, Thompson CM, Traynelis SF, Hansen KB (2019) Functional and pharmacological  
661 properties of triheteromeric GluN1/2B/2D NMDA receptors. *J Physiol* 597:5495-5514.

662

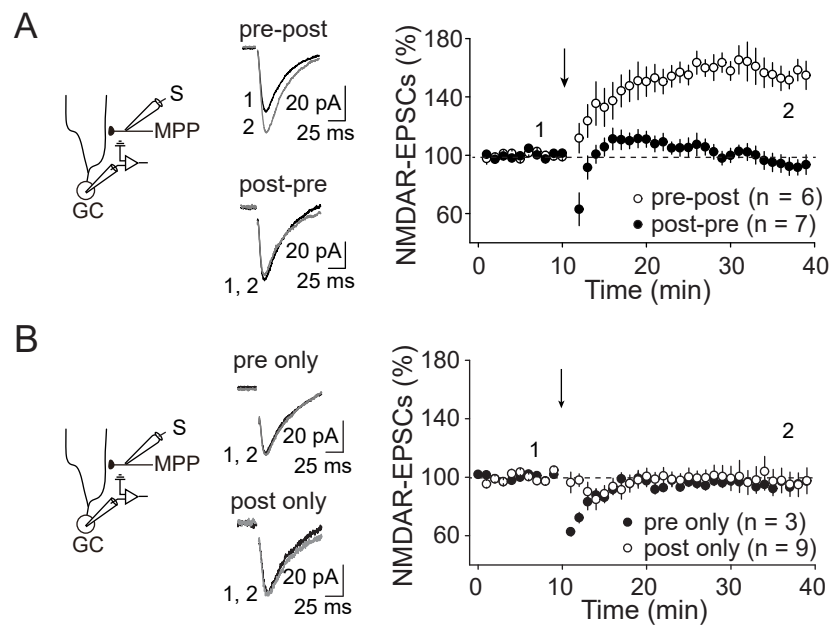

**Figure 1**

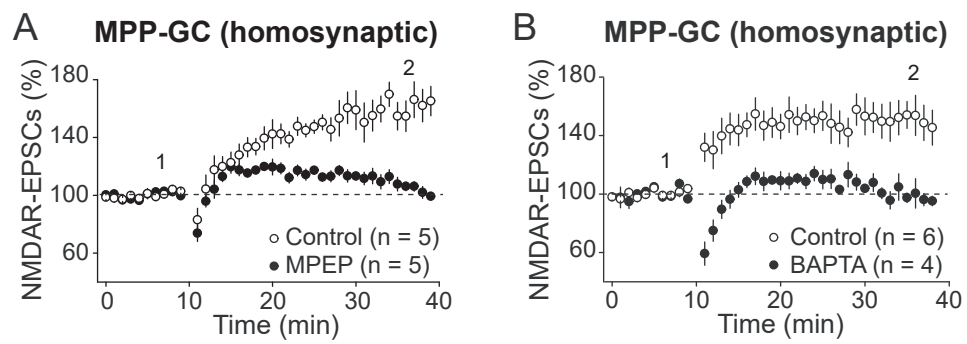

Figure 2

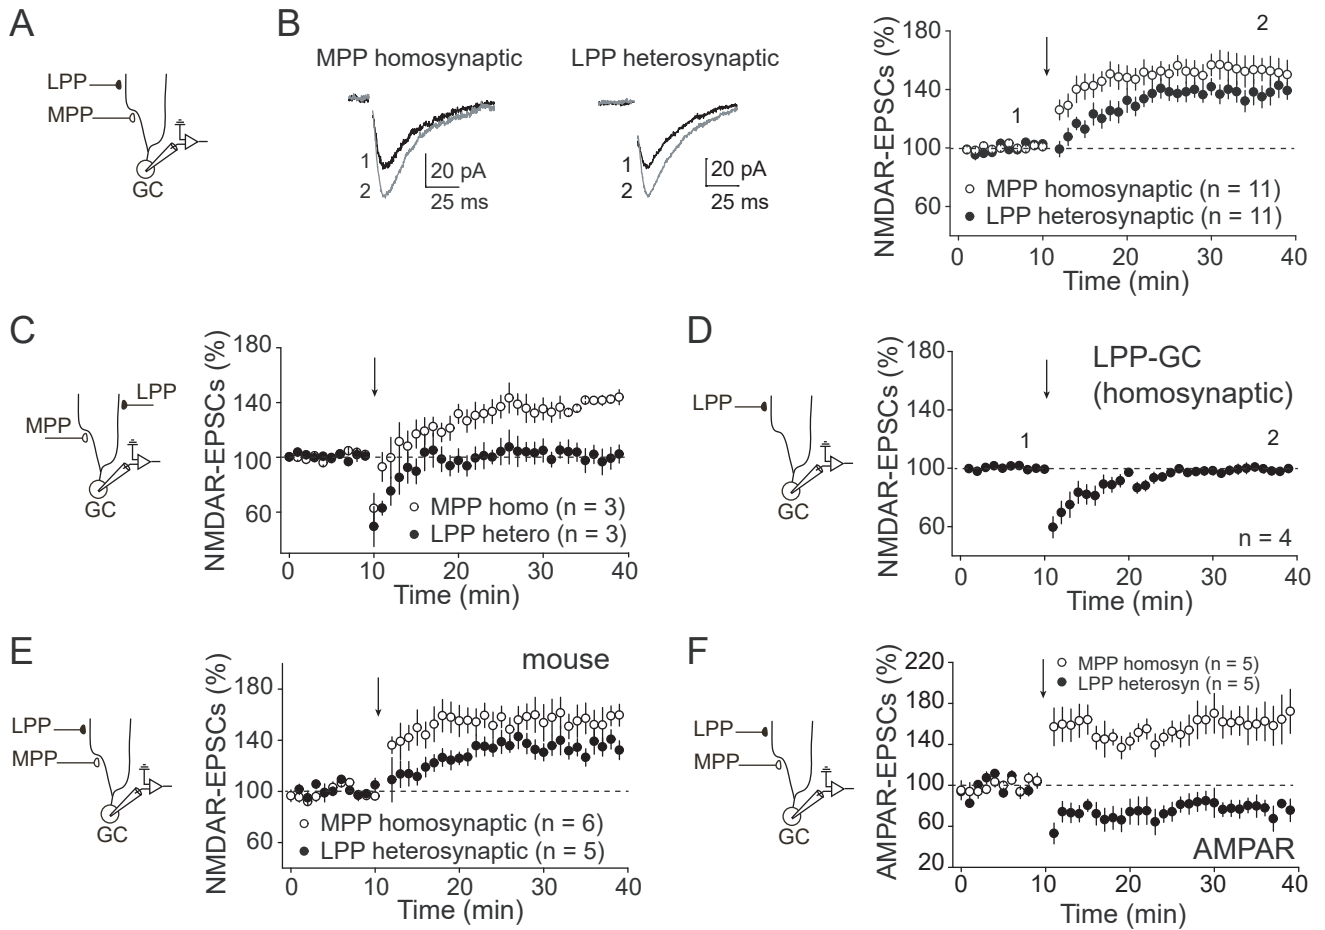

Figure 3

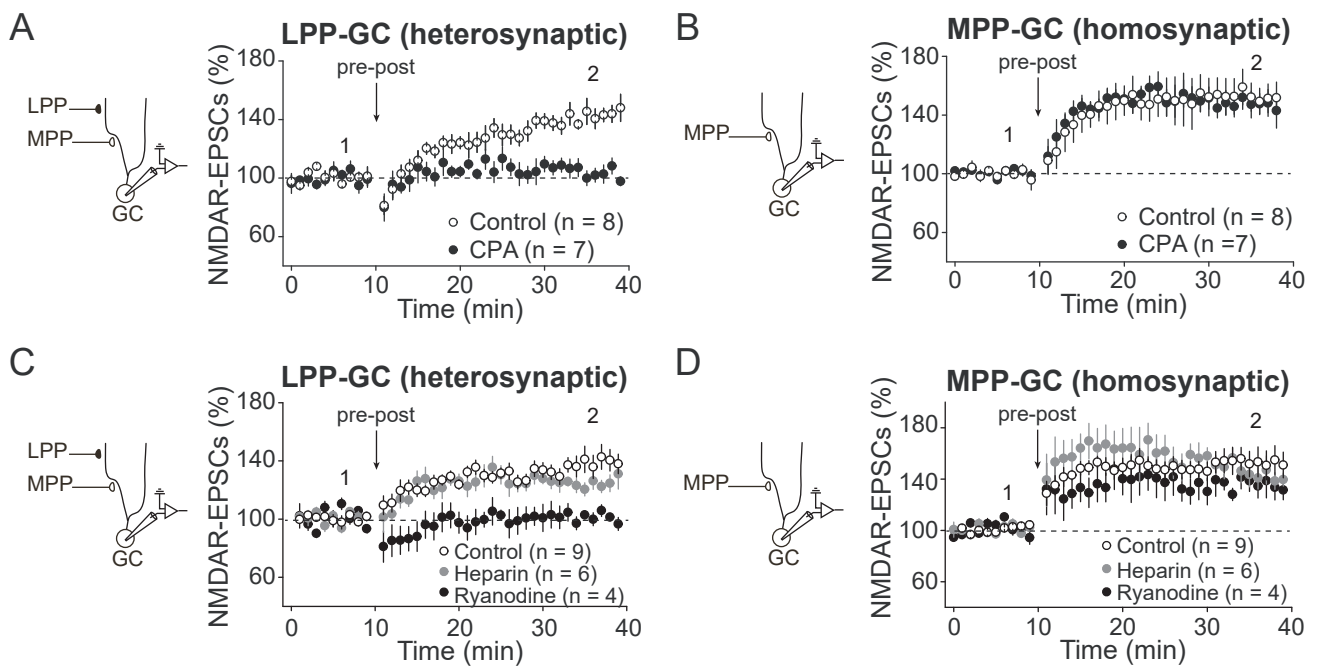

Figure 4



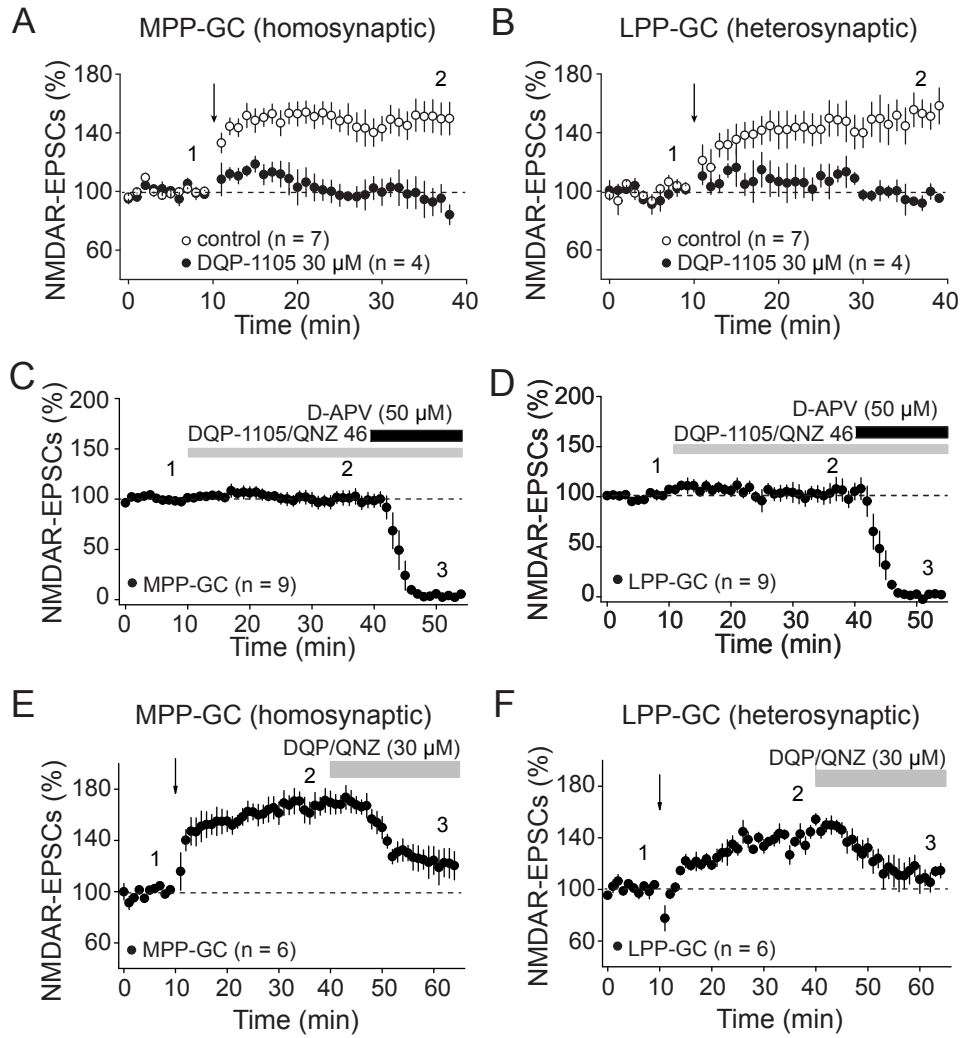

Figure 5
